# Supplementary material for: Geophagic Clays from Cameroon: Provenance, Metal Contamination and Health Risk Assessment
Source: MDPI journal article supplement (doi:10.3390/ijerph18168315), 2021-08-05
Supplement: s1 [file s1]

Table S1: Instrument detection limits (DL) of trace elements determined by LA-ICP-MS.

| Trace element | DL (ppm) | Trace element | DL (ppm) | Trace element | DL (ppm) |
|---------------|----------|---------------|----------|---------------|----------|
| Sc            | 0.014    | Mo            | 0.002    | Ho            | 0.001    |
| V             | 0.005    | Cs            | 0.004    | Er            | 0.001    |
| Cr            | 0.093    | Ba            | 0.004    | Tm            | 0.001    |
| Co            | 0.018    | La            | 0.001    | Yb            | 0.002    |
| Ni            | 0.033    | Ce            | 0.001    | Lu            | 0.001    |
| Cu            | 0.053    | Pr            | 0.001    | Hf            | 0.001    |
| Zn            | 0.034    | Nd            | 0.002    | Ta            | 0.001    |
| Rb            | 0.008    | Sm            | 0.002    | Pb            | 0.002    |
| Sr            | 0.001    | Eu            | 0.001    | Th            | 0.001    |
| Y             | 0.001    | Gd            | 0.002    | U             | 0.001    |
| Zr            | 0.001    | Tb            | 0        |               |          |
| Nb            | 0        | Dy            | 0.001    |               |          |

Table S2: Classes of EF and Igeo.

| Index       | Classes                    | Geophagic clay quality                    | References |
|-------------|----------------------------|-------------------------------------------|------------|
| EF          | $EF < 2$                   | No or minimal enrichment                  | [1]        |
|             | $2 < EF < 5$               | Moderate enrichment                       |            |
|             | $5 < EF < 20$              | Significant enrichment                    |            |
|             | $20 < EF < 40$             | Very high enrichment                      |            |
|             | $EF > 40$                  | Extremely enrichment                      |            |
| <i>Igeo</i> | Class 0: $I_{geo} < 0$     | Uncontaminated                            | [2]        |
|             | Class 1: $0 < I_{geo} < 1$ | Uncontaminated to moderately contaminated |            |
|             | Class 2: $1 < I_{geo} < 2$ | Moderately contaminated                   |            |
|             | Class 3: $2 < I_{geo} < 3$ | Moderately to heavily contaminated        |            |
|             | Class 4: $3 < I_{geo} < 4$ | Heavily contaminated                      |            |
|             | Class 5: $4 < I_{geo} < 5$ | Heavily to extremely heavily contaminated |            |
|             | Class 6: $I_{geo} > 5$     | Extremely contaminated                    |            |

Table S3: Definition and reference value of some parameters for health risk assessment of heavy metal in soils.

| Parameters                    | Description                               | Units                   | Children             | Adults               | References |
|-------------------------------|-------------------------------------------|-------------------------|----------------------|----------------------|------------|
| C <sub>i</sub>                | Trace metal concentration in soil         | mg/kg                   |                      |                      |            |
| CF                            | Conversion factor                         | kg/mg                   | 10 <sup>-6</sup>     | 10 <sup>-6</sup>     | [3]        |
| EF                            | Exposure frequency                        | day/year                | 365                  | 365                  | [4,5]      |
| ED                            | Exposure duration                         | year                    | 6                    | 30                   | [5]        |
| BW                            | Body weight                               | kg                      | 16                   | 70                   | [6]        |
| AT <sub>nc</sub>              | Average time for non-carcinogenic effects | day                     | 2190                 | 10950                | [7]        |
| AT <sub>ca</sub> <sup>b</sup> | Average time for carcinogenic effects     | day                     | -                    | 25550                | [4,5,7]    |
| IR <sub>soil</sub>            | Ingestion rate                            | mg/day                  | 200                  | 100                  | [3]        |
| IR <sub>air</sub>             | Respiratory rate                          | m <sup>3</sup> /day     | 7.5                  | 15                   | [8]        |
| PEF                           | Particulate emission factor               | m <sup>3</sup> /kg      | 1.36×10 <sup>9</sup> | 1.36×10 <sup>9</sup> | [5]        |
| SA                            | Skin Surface Area                         | cm <sup>2</sup>         | 2800                 | 5700                 | [4,5]      |
| AF                            | Adherence factor                          | mg/cm <sup>2</sup> /day | 0.2                  | 0.07                 | [4,5]      |
| ABS                           | Absorption factor                         | -                       | -                    | 0.001                | [4,5]      |

Table S4: Reference doses (RfD) and slope factors (SF) for non-carcinogenic and carcinogenic trace metals, respectively [4].

|    | Reference dose (RfD) |                       |           | Slope factor (SF) |                       |          |
|----|----------------------|-----------------------|-----------|-------------------|-----------------------|----------|
|    | Ingestion            | Inhalation            | Dermal    | Ingestion         | Inhalation            | Dermal   |
| Co | 2.00E-02             | -                     | -         | -                 | -                     | -        |
| Cr | 3.00E-03             | 2.86E-05              | 6.00E-05* | 5.01E-01          | 4.20E+01              | 2.00E+01 |
| Cu | 4.00E-02             | 4.00E-02              | 1.20E-02  | -                 | -                     | -        |
| Ni | 2.00E-02             | 9.00E-05 <sup>1</sup> | 5.40E-03  | 1.70E+00          | 8.40E-01 <sup>1</sup> | 4.25E+01 |
| Pb | 3.50E-03*            | 3.52E-03              | 5.24E-04  | 8.50E-03          | -                     | -        |
| Fe | 0.7                  | -                     | -         | -                 | -                     | -        |
| Zn | 3.00E-01             | 0.3                   | 6.00E-02  | -                 | -                     | -        |

<sup>1</sup>Source: [9,10].

Table S5: Trace elements concentrations (in ppm) in studied geophagic clays from Cameroon

|                   | Sc    | V      | Cr     | Co    | Ni    | Cu    | Rb     | Sr     | Y      | Zr      | Nb     | Ba      | Hf    | Th    | U    | Ta    | Pb    | Mo   | Cs     | Zn     |
|-------------------|-------|--------|--------|-------|-------|-------|--------|--------|--------|---------|--------|---------|-------|-------|------|-------|-------|------|--------|--------|
| <b>Acacia</b>     | 24.51 | 142.80 | 115.12 | 26.93 | 83.87 | 76.24 | 104.53 | 107.45 | 59.33  | 571.39  | 54.60  | 1052.24 | 15.58 | 25.37 | 5.67 | 3.76  | 31.91 | 2.30 | 4.80   | 328.27 |
| <b>Balengou</b>   | 12.30 | 7.69   | 5.28   | 11.94 | 8.12  | 35.82 | 2.24   | 2.82   | 105.94 | 1303.47 | 179.22 | 259.03  | 32.18 | 30.90 | 6.00 | 11.20 | 11.23 | 5.54 | 0.55   | 182.11 |
| <b>Bokwango</b>   | 23.01 | 110.56 | 119.86 | 4.37  | 27.39 | 26.10 | 35.68  | 104.08 | 42.42  | 313.08  | 52.17  | 209.08  | 8.95  | 24.53 | 3.69 | 3.66  | 35.09 | 2.39 | 5.06   | 41.99  |
| <b>Etoudi</b>     | 25.23 | 143.94 | 126.92 | 24.92 | 55.21 | 48.64 | 74.43  | 103.41 | 49.84  | 403.75  | 52.20  | 615.37  | 11.53 | 25.20 | 4.40 | 3.66  | 33.78 | 2.16 | 5.14   | 112.21 |
| <b>Madagascar</b> | 24.21 | 117.70 | 117.11 | 8.92  | 34.46 | 35.33 | 53.39  | 101.47 | 58.11  | 368.82  | 50.89  | 407.60  | 10.49 | 24.13 | 4.17 | 3.68  | 34.66 | 1.95 | 5.06   | 107.54 |
| <b>Mendong</b>    | 23.79 | 101.35 | 122.00 | 5.55  | 24.51 | 37.38 | 36.07  | 108.18 | 43.70  | 326.65  | 52.73  | 219.15  | 9.45  | 22.61 | 3.43 | 3.82  | 37.01 | 1.84 | 4.99   | 42.97  |
| <b>Mfoundi</b>    | 25.54 | 125.49 | 118.37 | 10.68 | 39.80 | 44.91 | 50.22  | 87.79  | 51.93  | 425.55  | 49.64  | 374.23  | 12.04 | 25.36 | 4.65 | 3.54  | 35.09 | 2.34 | 4.44   | 105.79 |
| <b>Mokolo</b>     | 23.28 | 131.86 | 121.49 | 14.59 | 45.37 | 52.96 | 62.99  | 99.62  | 57.91  | 394.97  | 57.47  | 526.39  | 11.17 | 24.70 | 4.81 | 4.04  | 33.44 | 2.22 | 4.83   | 76.84  |
| <b>Muda-Betsi</b> | 22.87 | 148.35 | 121.03 | 30.33 | 81.34 | 53.24 | 101.57 | 102.16 | 61.20  | 471.68  | 55.37  | 967.23  | 13.07 | 24.15 | 5.46 | 3.82  | 33.08 | 4.46 | 4.55   | 276.27 |
| <b>Mvo-Ada</b>    | 7.01  | 7.57   | 5.26   | 12.25 | 4.68  | 43.42 | 0.57   | 1.51   | 54.71  | 838.79  | 113.29 | 165.68  | 21.74 | 20.26 | 3.87 | 7.93  | 8.84  | 3.43 | <0.111 | 202.59 |
| <b>Mvog Ama</b>   | 27.89 | 123.57 | 144.76 | 6.16  | 23.73 | 22.80 | 34.51  | 115.20 | 45.84  | 302.59  | 51.27  | 225.70  | 8.78  | 24.79 | 4.08 | 3.74  | 41.27 | 2.21 | 4.77   | 41.54  |
| <b>Mvog-Betsi</b> | 19.90 | 95.79  | 98.74  | 5.97  | 19.69 | 37.94 | 24.40  | 57.79  | 50.59  | 678.67  | 80.07  | 140.43  | 18.39 | 26.94 | 4.65 | 5.47  | 24.04 | 3.01 | 4.05   | 57.68  |
| <b>Nkol-Eton</b>  | 23.13 | 110.83 | 113.89 | 7.29  | 28.56 | 28.75 | 40.22  | 105.21 | 44.95  | 308.92  | 53.43  | 217.01  | 9.10  | 24.24 | 3.23 | 3.86  | 35.97 | 2.15 | 5.74   | 43.87  |
| <b>Minimum</b>    | 7.01  | 7.57   | 5.26   | 4.37  | 4.68  | 22.80 | 0.57   | 1.51   | 42.42  | 302.59  | 49.64  | 140.43  | 8.78  | 20.26 | 3.23 | 3.54  | 8.84  | 1.84 | 0.55   | 41.54  |
| <b>Maximum</b>    | 27.89 | 148.35 | 144.76 | 30.33 | 83.87 | 76.24 | 104.53 | 115.20 | 105.94 | 1303.47 | 179.22 | 1052.24 | 32.18 | 30.90 | 6.00 | 11.20 | 41.27 | 5.54 | 5.74   | 328.27 |
| <b>Mean</b>       | 21.74 | 105.19 | 102.29 | 13.07 | 36.67 | 41.81 | 47.75  | 84.36  | 55.88  | 516.02  | 69.41  | 413.78  | 14.04 | 24.86 | 4.47 | 4.78  | 30.42 | 2.77 | 4.50   | 124.59 |

Table S6: Rare earth elements concentrations (in ppm) in studied geophagic clays from Cameroon

|                   | La     | Ce     | Pr    | Nd     | Sm    | Eu   | Gd    | Tb   | Dy    | Ho   | Er    | Tm   | Yb    | Lu   |
|-------------------|--------|--------|-------|--------|-------|------|-------|------|-------|------|-------|------|-------|------|
| <b>Acacia</b>     | 95.54  | 180.35 | 23.05 | 84.66  | 15.54 | 3.00 | 13.51 | 1.94 | 11.50 | 2.23 | 6.47  | 0.91 | 6.18  | 0.88 |
| <b>Balengou</b>   | 186.93 | 135.92 | 49.40 | 180.71 | 34.26 | 1.67 | 27.39 | 4.20 | 24.46 | 4.59 | 12.90 | 1.78 | 11.84 | 1.70 |
| <b>Bokwango</b>   | 109.68 | 205.86 | 25.67 | 89.85  | 14.65 | 2.70 | 11.31 | 1.59 | 8.95  | 1.69 | 4.75  | 0.65 | 4.32  | 0.61 |
| <b>Etoudi</b>     | 100.10 | 190.32 | 23.70 | 86.22  | 15.97 | 3.02 | 12.94 | 1.83 | 10.46 | 2.03 | 5.87  | 0.80 | 5.30  | 0.76 |
| <b>Madagascar</b> | 117.53 | 236.73 | 30.72 | 114.90 | 20.75 | 3.97 | 16.78 | 2.33 | 12.92 | 2.42 | 6.73  | 0.94 | 5.82  | 0.82 |
| <b>Mendong</b>    | 108.58 | 203.34 | 25.93 | 92.09  | 15.08 | 2.82 | 11.77 | 1.65 | 9.30  | 1.75 | 4.93  | 0.73 | 4.61  | 0.68 |
| <b>Mfoundi</b>    | 106.59 | 205.66 | 26.41 | 96.84  | 17.31 | 3.35 | 14.25 | 2.06 | 11.57 | 2.20 | 6.17  | 0.87 | 5.57  | 0.82 |
| <b>Mokolo</b>     | 105.65 | 226.55 | 27.10 | 100.86 | 18.83 | 3.60 | 15.94 | 2.28 | 12.83 | 2.43 | 6.77  | 0.98 | 6.25  | 0.89 |
| <b>Muda-Betsi</b> | 102.32 | 193.79 | 25.43 | 94.00  | 17.09 | 3.48 | 14.86 | 2.15 | 12.20 | 2.37 | 6.94  | 0.99 | 6.22  | 0.95 |
| <b>Mvo-Ada</b>    | 40.65  | 84.24  | 14.52 | 57.39  | 13.56 | 0.53 | 12.20 | 2.03 | 12.35 | 2.42 | 6.93  | 1.09 | 6.80  | 1.09 |
| <b>Mvog Ama</b>   | 116.95 | 237.79 | 30.52 | 109.96 | 19.09 | 3.57 | 14.08 | 1.97 | 11.00 | 1.97 | 5.61  | 0.78 | 5.02  | 0.76 |
| <b>Mvog-Betsi</b> | 99.01  | 134.01 | 25.09 | 90.44  | 15.78 | 1.81 | 11.96 | 1.85 | 10.93 | 2.16 | 6.24  | 0.91 | 6.07  | 0.90 |
| <b>Nkol-Eton</b>  | 108.72 | 195.73 | 24.83 | 89.33  | 15.55 | 2.98 | 12.66 | 1.76 | 9.98  | 1.87 | 5.28  | 0.76 | 4.77  | 0.70 |
| <b>Minimum</b>    | 40.65  | 84.24  | 14.52 | 57.39  | 13.56 | 0.53 | 11.31 | 1.59 | 8.95  | 1.69 | 4.75  | 0.65 | 4.32  | 0.61 |
| <b>Maximum</b>    | 186.93 | 237.79 | 49.40 | 180.71 | 34.26 | 3.97 | 27.39 | 4.20 | 24.46 | 4.59 | 12.90 | 1.78 | 11.84 | 1.70 |
| <b>Mean</b>       | 107.56 | 186.94 | 27.10 | 99.02  | 17.96 | 2.81 | 14.59 | 2.12 | 12.19 | 2.32 | 6.58  | 0.94 | 6.06  | 0.89 |

## References

1. Sutherland, R.A. Bed Sediment-Associated Trace Metals in an Urban Stream, Oahu, Hawaii. *Environmental Geology* **2000**, 39, 611–627, doi:10.1007/s002540050473.
2. Muller, G. Index of Geoaccumulation in Sediments of the Rhine River. *Geojournal* **1969**, 2, 108–118.
3. USEPA, (US Environmental Protection Agency) *Risk Assessment Guidance for Superfund*; DC: Office of Emergency and Remedial Response: Washington, USA, 1989;
4. Adimalla, N. Heavy Metals Contamination in Urban Surface Soils of Medak Province, India, and Its Risk Assessment and Spatial Distribution. *Environ Geochem Health* **2020**, 42, 59–75, doi:10.1007/s10653-019-00270-1.
5. USEPA, (US Environmental Protection Agency) *Supplemental Guidance for Developing Soil Screening Levels for Superfund Sites*; Office of Emergency and Remedial Response: Washington, USA, 2002.
6. Li, F.; Zhang, J.; Cao, T.; Li, S.; Chen, Y.; Liang, X.; Zhao, X.; Chen, J. Human Health Risk Assessment of Toxic Elements in Farmland Topsoil with Source Identification in Jilin Province, China. *IJERPH* **2018**, 15, 1040, doi:10.3390/ijerph15051040.
7. Gu, Y.-G.; Gao, Y.-P.; Lin, Q. Contamination, Bioaccessibility and Human Health Risk of Heavy Metals in Exposed-Lawn Soils from 28 Urban Parks in Southern China's Largest City, Guangzhou. *Applied Geochemistry* **2016**, 67, 52–58, doi:10.1016/j.apgeochem.2016.02.004.
8. USEPA, (US Environmental Protection Agency) *Risk Assessment Guidance for Superfund*; DC: Office of Emergency and Remedial Response: Washington, USA, 2004.
9. Ferreira-Baptista, L.; De Miguel, E. Geochemistry and Risk Assessment of Street Dust in Luanda, Angola: A Tropical Urban Environment. *Atmospheric Environment* **2005**, 39, 4501–4512, doi:10.1016/j.atmosenv.2005.03.026.
10. Li, Z.; Ma, Z.; van der Kuijp, T.J.; Yuan, Z.; Huang, L. A Review of Soil Heavy Metal Pollution from Mines in China: Pollution and Health Risk Assessment. *Science of The Total Environment* **2014**, 468–469, 843–853, doi:10.1016/j.scitotenv.2013.08.090.
